# Supplementary material for: Curcumin Inhibits α-Synuclein Aggregation by Acting on Liquid–Liquid Phase Transition
Source: MDPI journal article supplement (doi:10.3390/foods13091287), 2024-04-23
Supplement: s1 [file s1]

## Supporting Information

**Table S1.** Binding free energies between 10mer  $\alpha$ -Syn<sup>38-98</sup> and curcumins under the shared four kinds of binding modes evaluated with MM/PBSA approach.<sup>a</sup>

| Complex       | Mode  | Energy components       |                         |                        |                        |                          |
|---------------|-------|-------------------------|-------------------------|------------------------|------------------------|--------------------------|
|               |       | $\Delta E_{\text{ele}}$ | $\Delta E_{\text{vdW}}$ | $\Delta G_{\text{GB}}$ | $\Delta G_{\text{SA}}$ | $\Delta G_{\text{bind}}$ |
| 10mer + 5Cur  | mode1 | $-6.71 \pm 1.98$        | $-44.64 \pm 3.26$       | $9.96 \pm 1.75$        | $-5.79 \pm 0.28$       | $-47.18 \pm 3.34$        |
|               | mode2 | $-4.21 \pm 1.45$        | $-42.13 \pm 2.52$       | $8.05 \pm 1.25$        | $-6.26 \pm 0.17$       | $-44.54 \pm 2.51$        |
|               | mode3 | $-3.14 \pm 1.86$        | $-30.42 \pm 6.07$       | $6.03 \pm 1.78$        | $-4.83 \pm 0.84$       | $-32.35 \pm 6.43$        |
|               | mode4 | $-5.21 \pm 1.16$        | $-48.29 \pm 3.67$       | $8.18 \pm 0.99$        | $-6.60 \pm 0.22$       | $-51.93 \pm 3.77$        |
| 10mer + 10Cur | mode1 | $-4.09 \pm 2.11$        | $-37.47 \pm 6.56$       | $7.48 \pm 2.17$        | $-5.56 \pm 0.99$       | $-39.65 \pm 6.90$        |
|               | mode2 | $-2.31 \pm 0.86$        | $-40.26 \pm 3.16$       | $6.04 \pm 0.81$        | $-6.17 \pm 0.28$       | $-42.71 \pm 3.05$        |
|               | mode3 | $-6.31 \pm 1.82$        | $-46.66 \pm 3.81$       | $9.60 \pm 1.54$        | $-6.30 \pm 0.56$       | $-49.66 \pm 4.12$        |
|               | mode4 | $-0.43 \pm 0.64$        | $-12.16 \pm 1.39$       | $1.68 \pm 0.54$        | $-1.94 \pm 0.17$       | $-12.85 \pm 1.46$        |

<sup>a</sup> Energies are in kcal/mol.

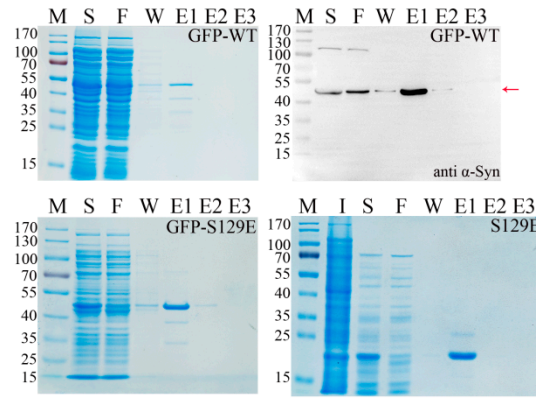

**Fig. S1.** Western blot analysis of GFP/ $\alpha$ -Syn and purification of  $\alpha$ -Syn mutant S129E.

The elution efficiency of elution buffer containing different imidazole concentration was detected by 12% SDS-PAGE, and the target protein of GFP-WT (same image in Fig 1) or mutant S129E can be completely eluted with 50 mM imidazole. Lane M: molecular weight marker; lane S: supernatant of cell lysate; lane I: induced whole cell; lane F: Flow-through; lane W: Wash; lane E1: Elution with 50 mM imidazole; lane E2: Elution with 100 mM imidazole; lane E3: Elution with 250 mM imidazole.

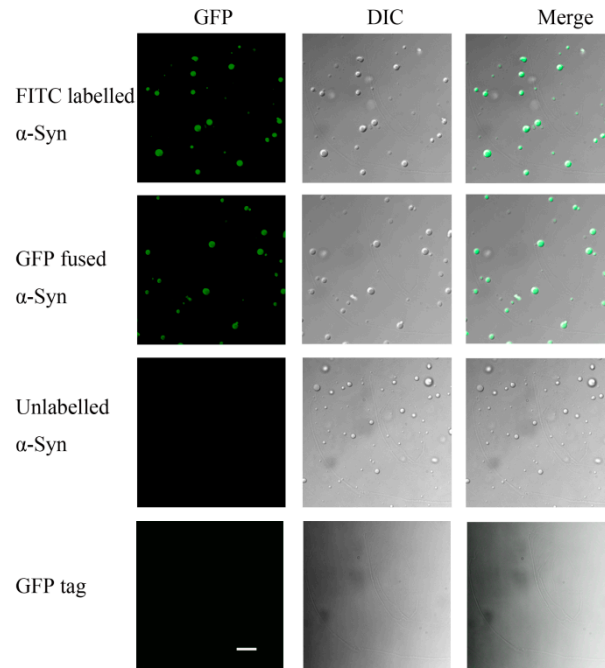

**Fig. S2.** The effect of fluorescence labeling on  $\alpha$ -Syn LLPS.

The droplets formation of FITC labelled or GFP-fused  $\alpha$ -Syn is same as that of unlabeled  $\alpha$ -Syn, scale bar 10  $\mu$ m.

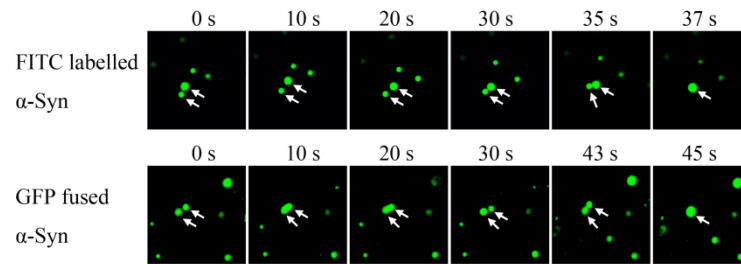

**Fig. S3.** The droplets fusions of FITC labelled or GFP-fused  $\alpha$ -Syn.

The droplets fusions of FITC labelled or GFP-fused  $\alpha$ -Syn did not differ significantly. Both fluorescence labelled droplets were highly mobile and underwent frequent fusion events with a rapid relaxation into spherical assemblies.

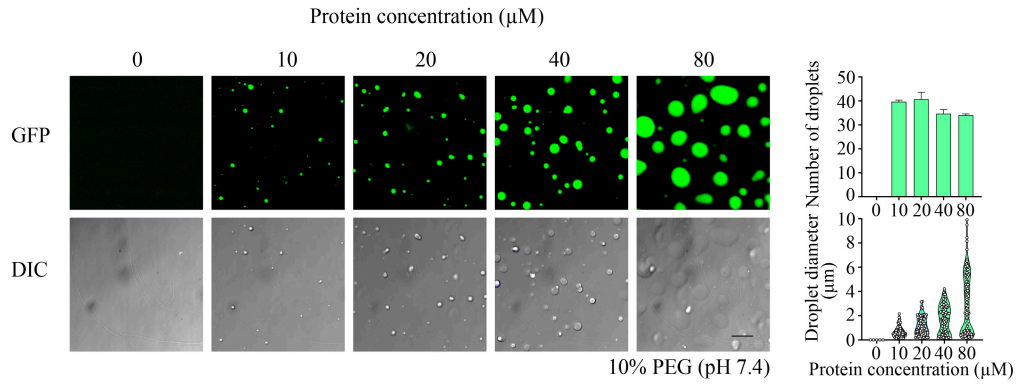

**Fig. S4.** Effects of protein concentration on the LLPS behavior of  $\alpha$ -Syn. Representative fluorescence and differential interference contrast (DIC) images of droplets produced by phase separation of GFP- $\alpha$ Syn incubated at the noted protein concentrations at pH 7.4. (Scale bar, 10  $\mu\text{m}$ ).

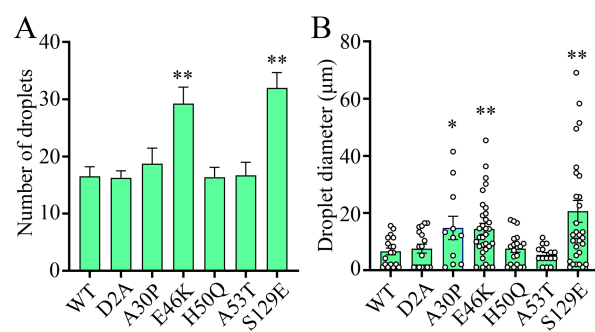

**Fig. S5.** The mean numbers and diameters of droplets at 7.4 pH in Figure 4 were quantitated using ImageJ.

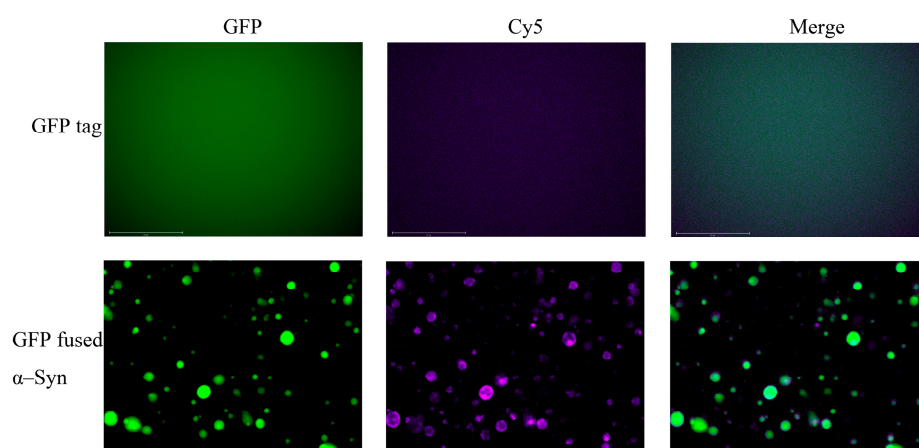

**Fig. S6.** Co-localization of curcumin and  $\alpha$ -Syn during droplets formation. GFP-tagged  $\alpha$ -Syn (80  $\mu$ M) was induced to undergo LLPS in the presence of 10% PEG-6000 and in the presence of 10  $\mu$ M Cy5.5-curcumin.

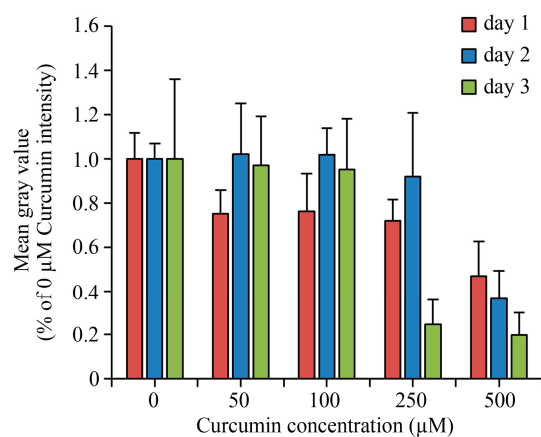

**Fig. S7.** The dose-dependent effects of curcumin on oligomer formation in Figure 6C were quantitated by scanning for mean gray values (% of 0  $\mu$ M curcumin intensity) using ImageJ.



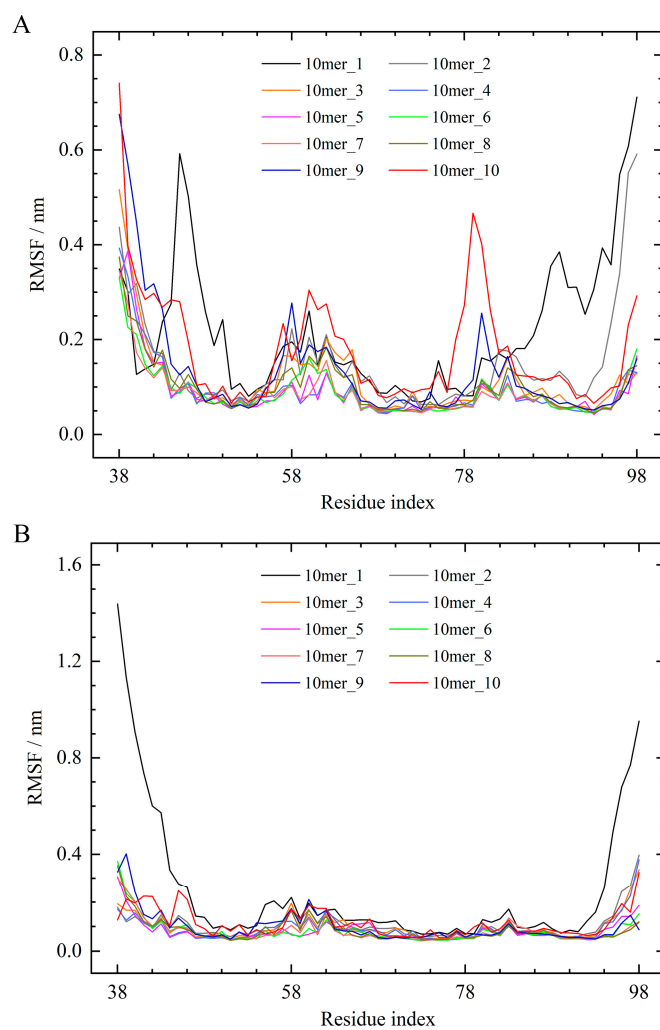

**Fig. S8.** The root-mean-square fluctuations (RMSFs) of the 10mer  $\alpha$ -Syn<sup>38-98</sup> with 5 (A) and 10 (B) curcumin molecules bound, respectively.

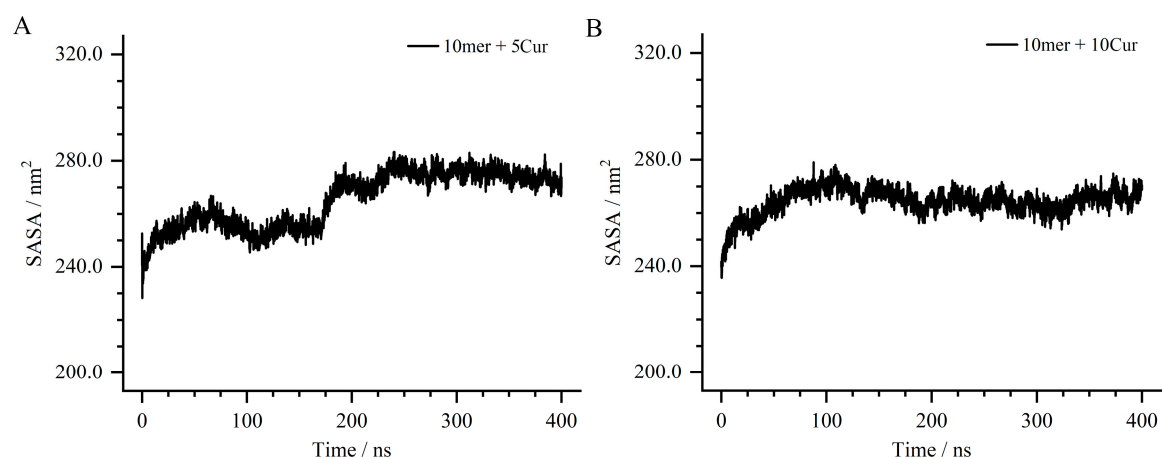

**Fig. S9.** The solvent accessible surface area (SASA) of the 10mer  $\alpha$ -Syn<sup>38-98</sup> with 5 (A) and 10 (B) curcumin molecules bound, respectively.

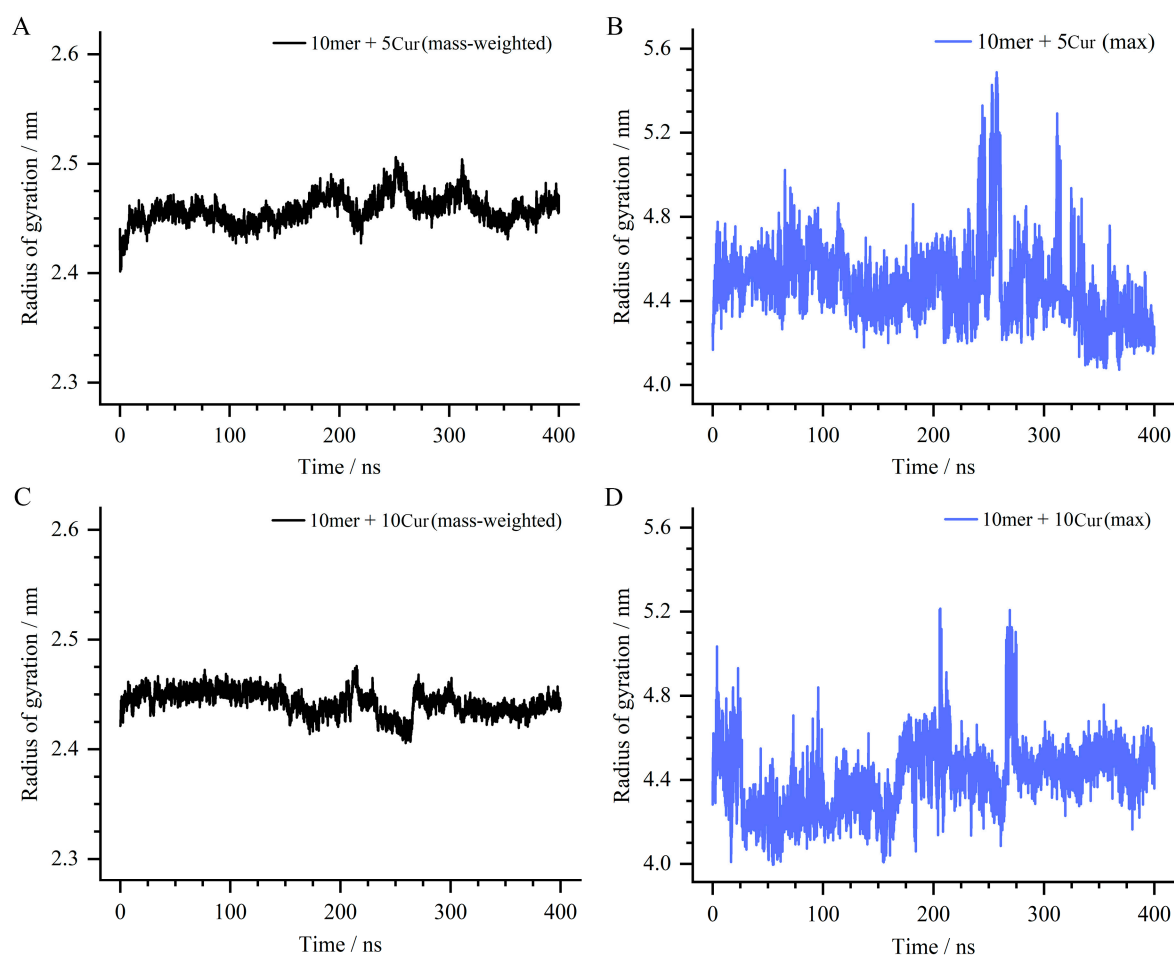

**Fig. S10.** The mass-weighted and max radius of gyration (Rg) of the 5Cur (A and B) and 10Cur (C and D) bound 10mer  $\alpha$ -Syn<sup>38-98</sup>.

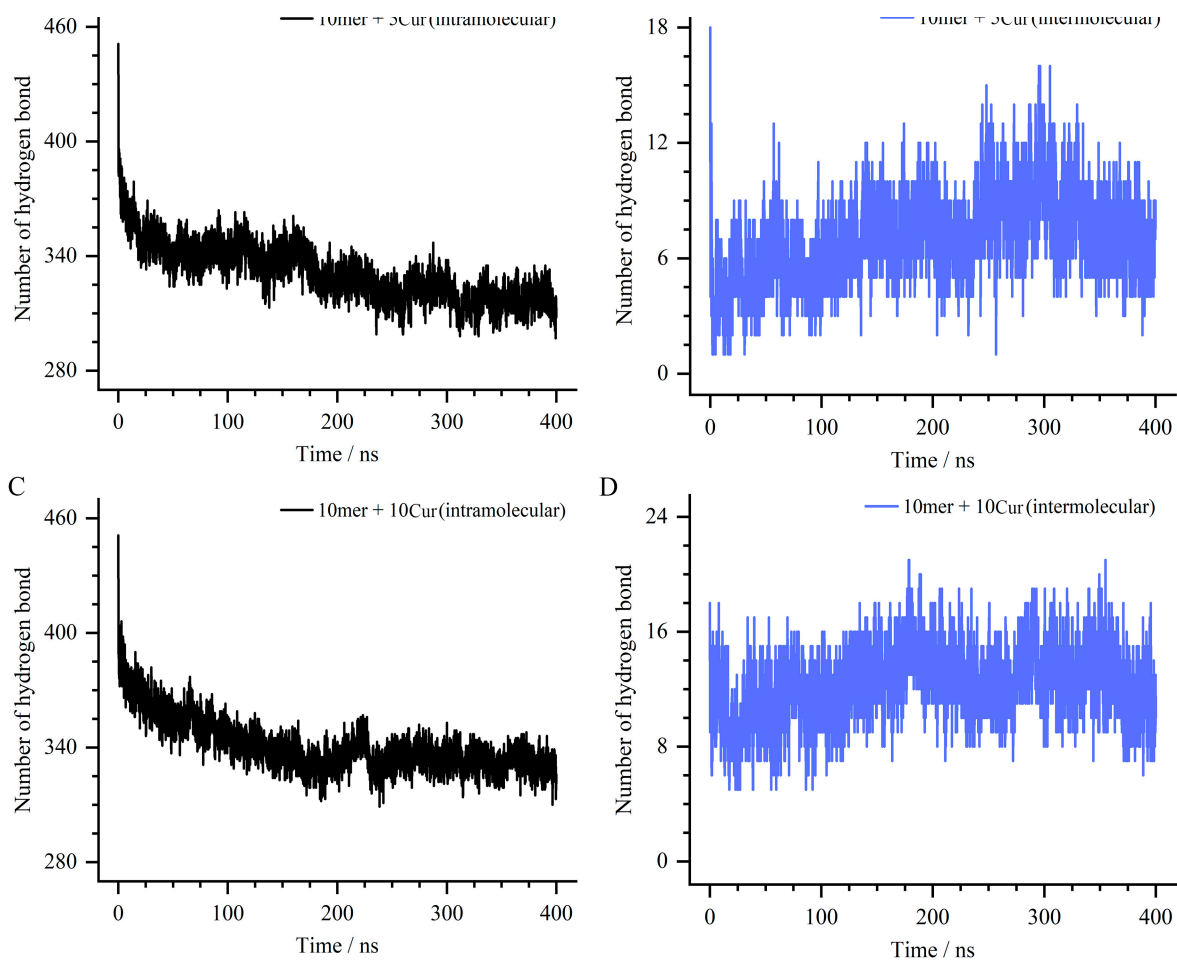

**Fig. S11.** The intramolecular hydrogen bonds within the backbones of the 5Cur (A) and 10Cur (C) bound 10mer  $\alpha$ -Syn<sup>38-98</sup> together with the intermolecular hydrogen bonds between 10mer  $\alpha$ -Syn<sup>38-98</sup> and the binding 5Cur (B) and 10Cur (D).

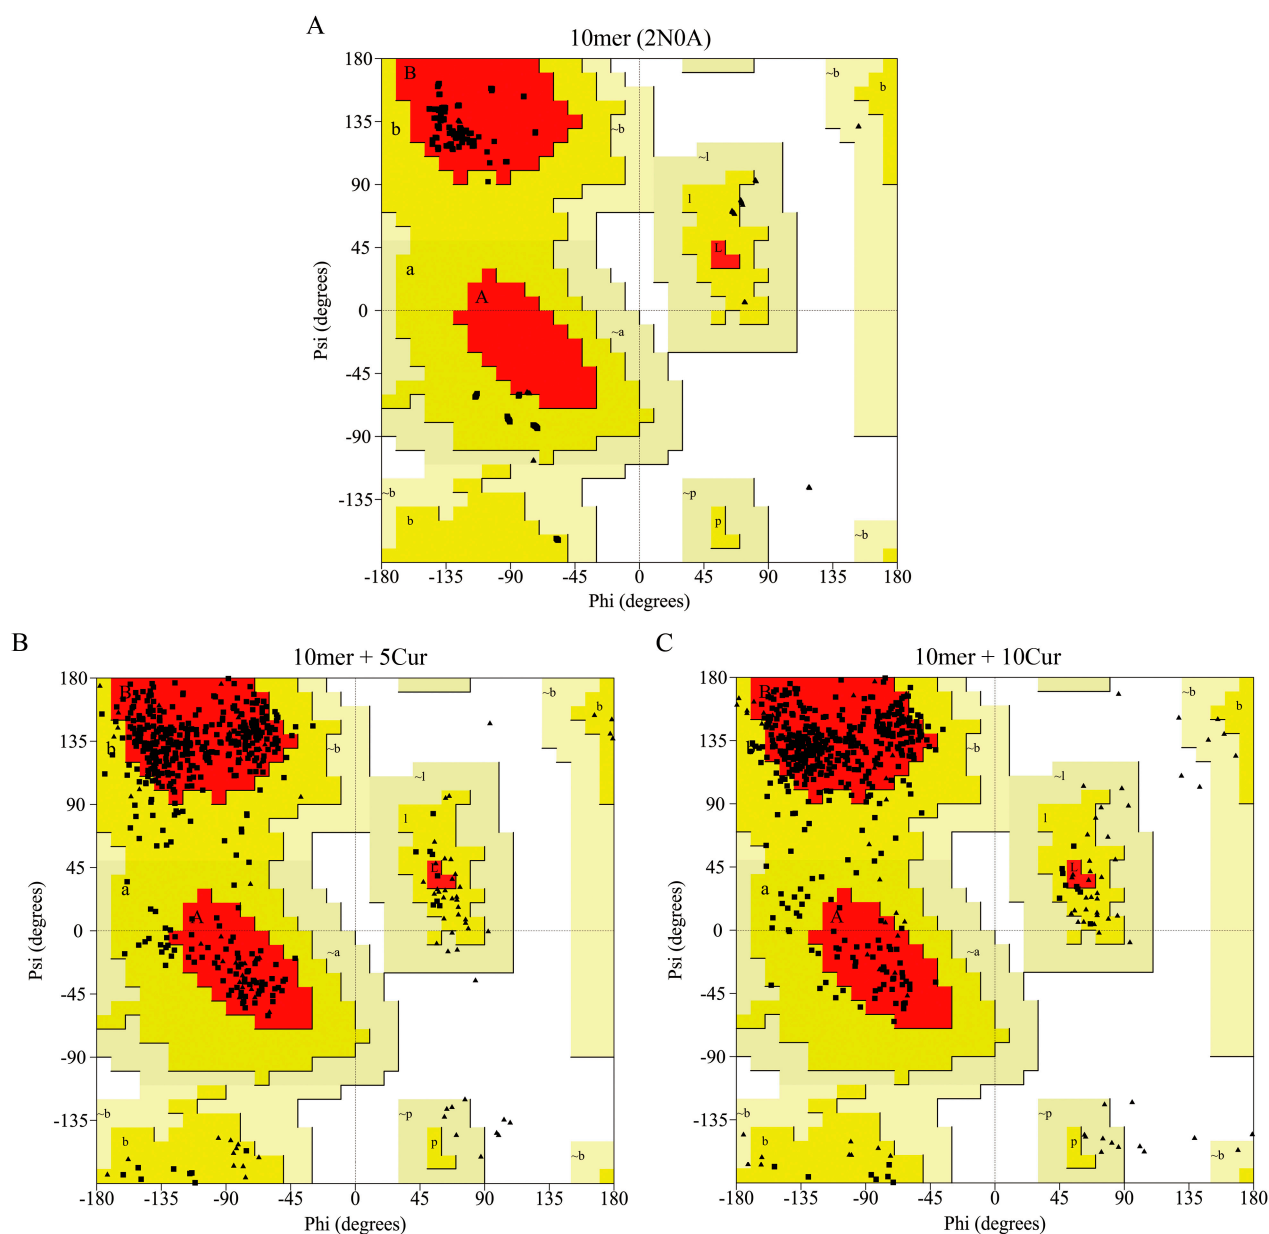

**Fig. S12.** The Ramachandran plots of the apo and the curcumin bound 10mer  $\alpha$ -Syn<sup>38-98</sup>. The proportions of the residues in most favored regions were 89.4%, 83.8%, and 80.8% for the NMR 10mer structure (2N0A), the 5Cur-bound 10mer, and the 10Cur-bound 10mer, respectively. The figure was generated with the online service of SAVES v6.0 (<https://saves.mbi.ucla.edu>).
